# Supplementary material
Source: publisher figshare collection journal article supplement (https://acs.figshare.com/ndownloader/files/36018015)
Supplement: Supplementary file 1 [file 36018015]

# Eco-efficiency of mealworms (*Tenebrio molitor*) protein extracts

## Supporting information

Myriam Laroche, Véronique Perreault, Alice Marciniak, Sergey Mikhaylin and Alain Doyen\*

*Department of Food Sciences, Dairy Research Center STELA, Institute of Nutrition and Functional Foods (INAF), Université Laval, Quebec City, QC, G1V 0A6, Canada.*

\*Corresponding author: Alain Doyen  
Department of Food Sciences  
Pavillon Paul-Comtois  
2425 Rue de l'Agriculture, Local 2322B  
Université Laval,  
Quebec City, Quebec, G1V 0A6 Canada  
Phone number: +1418-656-2131 ext. 405454  
E-mail address: [alain.doyen@fsaa.ulaval.ca](mailto:alain.doyen@fsaa.ulaval.ca)

6 pages; 2 Tables; 6 Equations

Table S1. LCA input and output

Table S2. Data and references used in Figure 5

Equation S1. Electricity for blanching

Equation S2. Electricity for homogenization

Equation S3. Electricity for centrifugation

Equation S4. Electricity for stirring during protein solubilization

Equation S5. Electricity for heating during protein solubilization

Equation S6. Steam for pre-concentration

Equation S7. Electricity for drying

Equation S8. Electricity for hexane and ethanol recovery

**Table S1.** LCA input and output

Input to produce 1 kg mealworms (Mealworm rearing phase)

| INPUT                      | PROCESS                                                                                                                          | QUANTITY   | DATA SOURCE                                    |
|----------------------------|----------------------------------------------------------------------------------------------------------------------------------|------------|------------------------------------------------|
| STEEL FRAME (KG)           | steel, low-alloyed   market for steel, low-alloyed                                                                               | 0.008136   | 33                                             |
| STEEL (GALVANIZED) (KG)    | sheet rolling, steel   market for sheet rolling, steel                                                                           | 0.001238   |                                                |
| POLYURETHANE FOAM (KG)     | polystyrene foam slab   market for polystyrene foam slab                                                                         | 0.0008331  |                                                |
| SAWNWOOD (M <sup>3</sup> ) | sawnwood, softwood, dried (u=10%), planed   market for sawnwood, softwood, dried (u=10%), planed                                 | 1.433E-05  |                                                |
| CONCRETE (M <sup>3</sup> ) | concrete, sole plate and foundation   market for concrete, sole plate and foundation                                             | 3.508E-05  |                                                |
| GLASSWOOL (KG)             | glass wool mat   market for glass wool mat                                                                                       | 0.0003351  |                                                |
| PVC (KG)                   | polyvinylchloride, bulk polymerised   market for polyvinylchloride, bulk polymerised                                             | 2.526E-05  |                                                |
| WATER (KG)                 | tap water   market for tap water CA,Qc                                                                                           | 2.536      | 34                                             |
| ELECTRICITY (KWH)          | electricity, medium voltage   electricity voltage transformation from high to medium voltage                                     | 2.286      | Personnal communication with a local TM farmer |
| WHEAT BRAN (KG)            | wheat bran                                                                                                                       | 1.383      | 33 - 35                                        |
| DDGS (KG)                  | Distiller's Dried Grains with Solubles   market for Distiller's Dried Grains with Solubles                                       | 1.106      |                                                |
| CARROT (KG)                | carrot   carrot335 production                                                                                                    | 0.2766     | 33                                             |
| PET (KG)                   | polyethylene, high density, granulate   market for polyethylene, high density, granulate                                         | 0.0290     |                                                |
| GLASS (KG)                 | glass tube, borosilicate   market for glass tube, borosilicate                                                                   | 8.927E-07  |                                                |
| STEEL (KG)                 | steel, low-alloyed   market for steel, low-alloyed                                                                               | 0.0003153  |                                                |
| POLYURETHANE (KG)          | polyurethane, rigid foam   market for polyurethane, rigid foam                                                                   | 0.0003158  |                                                |
| POLYVINYLCHLORIDE (KG)     | polyvinylchloride, bulk polymerised   market for polyvinylchloride, bulk polymerised                                             | 1.710E-05  |                                                |
| ALUMINIUM (KG)             | aluminium alloy, AlMg3   market for aluminium alloy, AlMg3                                                                       | 2.229E-07  |                                                |
| SODIUM HYDROXIDE (KG)      | sodium hydroxide, without water, in 50% solution state   market for sodium hydroxide, without water, in 50% solution state       | 2.871E-06  |                                                |
| SODIUM HYPOCHLORITE (KG)   | sodium hypochlorite, without water, in 15% solution state   market for sodium hypochlorite, without water, in 15% solution state | 5.511E-05  |                                                |
| AMMONIUM CHLORIDE (KG)     | ammonium chloride   market for ammonium chloride                                                                                 | 2.5835E-05 |                                                |
| POLYPROPYLENE (KG)         | polypropylene, granulate   market for polypropylene, granulate                                                                   | 8.1267E-07 |                                                |

|                       |                                         |        |    |
|-----------------------|-----------------------------------------|--------|----|
| CO <sub>2</sub> (G)   | Emission to atmosphere - Carbon dioxide | 1134.1 | 12 |
| CH <sub>4</sub> (G)   | Emission to atmosphere - Methane        | 0.11   |    |
| N <sub>2</sub> O (MG) | Emission to air - Dinitrogen monoxide   | 28.05  |    |
| NH <sub>3</sub> (MG)  | Emission to air - Ammonia               | 100.1  |    |

## Processing phase

|       | INPUT/OUTPUT      | PROCESS                                                                                                                                    | SCENARIO 1 |        |        |        | SCENARIO 2 |        |         |         | DATA SOURCE     |
|-------|-------------------|--------------------------------------------------------------------------------------------------------------------------------------------|------------|--------|--------|--------|------------|--------|---------|---------|-----------------|
|       |                   |                                                                                                                                            | SP1        | SP2    | IP3    | IP4    | SP1        | SP2    | IP3     | IP4     |                 |
| INPUT | Mealworm (KG)     | Mealworm rearing phase                                                                                                                     | 2 181      | 2 006  | 2 120  | 2 042  | 3 701      | 5 489  | 7 589   | 7 477   | From experiment |
|       | Water (L)         | tap water   tap water production, conventional treatment                                                                                   | 12 871     | 23 512 | 57 379 | 73 801 | 20 871     | 31 043 | 10 2072 | 10 4671 | From experiment |
|       | Electricity (KWH) | electricity, medium voltage   electricity voltage transformation from high to medium voltage                                               | 8 759      | 9 315  | 11 074 | 11 765 | 11 235     | 10 779 | 18 044  | 16 167  | 1, 38, 40, 41   |
|       | Steam (KG)        | steam, in chemical industry   market for steam, in chemical industry                                                                       | 6 866      | 9 443  | -      | -      | 6 866      | 9 443  | -       | -       | 39              |
|       | Hexane (KG)       | hexane   market for hexane                                                                                                                 | 1          | 1      | 2      | 2      | 2          | 2      | 5       | 3       | 36              |
|       | Ethanol (KG)      | ethanol, without water, in 99.7% solution state, from ethylene   market for ethanol, without water, in 99.7% solution state, from ethylene | 1          | 1      | 1      | 2      | 2          | 1      | 4       | 3       |                 |
|       | NaOH (KG)         | sodium hydroxide, without water, in 50% solution state   market for sodium hydroxide,                                                      | 326        | 599    | 442    | 995    | 552        | 813    | 1 133   | 1 639   | From experiment |

|        |                          |                                                                                                                                             |        |        |        |        |        |        |         |        |                 |
|--------|--------------------------|---------------------------------------------------------------------------------------------------------------------------------------------|--------|--------|--------|--------|--------|--------|---------|--------|-----------------|
| OUTPUT |                          | without water, in 50%<br>solution state                                                                                                     |        |        |        |        |        |        |         |        |                 |
|        | HCl (KG)                 | hydrochloric acid,<br>without water, in 30%<br>solution state   market<br>for hydrochloric acid,<br>without water, in 30%<br>solution state | 321    | 479    | 560    | 990    | 321    | 551    | 846     | 1 201  | From experiment |
|        | Emission - Hexane (KG)   | Hexane                                                                                                                                      | 1      | 1      | 2      | 2      | 2      | 2      | 5       | 3      | 36              |
|        | Emission - Ethanol (KG)  | Ethanol                                                                                                                                     | 1      | 1      | 1      | 2      | 2      | 1      | 4       | 3      | 36              |
|        | Wastewater (L)           | wastewater, average  <br>treatment of<br>wastewater, average,<br>capacity 1.1E10 L/year                                                     | 10 903 | 10 032 | 30 395 | 34 417 | 18 504 | 13 610 | 11 0606 | 92 537 | From experiment |
|        | Waste (KG)               | biowaste   treatment of<br>biowaste, composting                                                                                             | -      | -      | -      | -      | 626    | 325    | 1283    | 656    | From experiment |
|        | Lipid fraction (KG)      | -                                                                                                                                           | 624    | 459    | 1279   | 925    | 624    | 459    | 1279    | 925    | From experiment |
|        | Chitin fraction (KG)     | -                                                                                                                                           | 626    | 325    | 1283   | 656    | -      | -      | -       | -      |                 |
|        | Supernatant (L)          | -                                                                                                                                           | -      | -      | 32726  | 47340  | -      | -      | -       | -      |                 |
|        | TM protein extract (Ton) | -                                                                                                                                           | 1      | 1      | 1      | 1      | 1      | 1      | 1       | 1      | From experiment |

**Table S2.** Data and references used in Figure 5.

| Protein source                | Protein (g) / product (kg) | GWP (kg CO <sub>2</sub> eq./kg) | Eco-efficiency score <sup>1</sup> | Reference     |
|-------------------------------|----------------------------|---------------------------------|-----------------------------------|---------------|
| Scenario 1                    | 547 – 800                  | 3.5 - 5.5                       | 14.5 - 156.3                      | Current study |
| Scenario 2                    | 547 – 800                  | 6.3 – 10.9                      | 50.2 - 127.0                      |               |
| Soy protein isolate           | 870                        | 1 - 6                           | 145 - 870                         | 50            |
| Whey protein concentrate      | 800                        | 12 - 16                         | 50 - 67                           |               |
| Skim milk powder              | 350                        | 7 - 9.1                         | 38.5 – 50.0                       |               |
| Sodium caseinate              | 910                        | 17 - 27                         | 33.7 – 53.5                       |               |
| Microbial protein             | 650                        | 1 - 8                           | 81.25 - 650                       | 51            |
| Faba bean protein ingredients | 900                        | 3                               | 300                               | 52            |
| Lupin seeds protein isolates  | 930                        | 6                               | 155                               | 53            |
| Egg protein concentrate       | 800                        | 23.4                            | 34                                | 54            |

<sup>1</sup> Calculated using Equation 4 with GWP values above for each protein source.

### General equations for energy consumption

**Equation S1.** Electricity for blanching <sup>3</sup>

$$\text{Electricity (kwh)} = \left( \frac{W \cdot \Delta T \cdot SW}{3\,600\,000} \right) + \left( \frac{TM \cdot \Delta T \cdot STM}{3\,600\,000} \right) \quad (\text{S1})$$

W: Quantity of water (g)

ΔT: Temperature difference (°C)

SW: Specific heat of water (4.184 J / g / °C)

3 600 000: Conversion factor from J to kwh

STM<sup>38</sup>: Specific heat of TM (3320 J / kg / °C)

TM: Quantity of TM (kg)

**Equation S2.** Electricity for homogenisation <sup>1</sup>

$$\text{Electricity (kwh)} = \frac{EP \cdot TM \cdot V}{C} \quad (\text{S2})$$

EP: Engine power (2.2 kW)

TM: Quantity of TM (kg)  
V: Volume to homogenize (L/kg TM)  
C: Capacity (500 L/h)

**Equation S3.** Electricity for centrifugation <sup>41</sup>

$$\text{Electricity (kwh)} = \frac{EP \cdot TM \cdot V}{C} \quad (\text{S3})$$

EP: Engine power (19 kW)  
TM: Quantity of TM (kg)  
V: Volume to centrifuge (L/kg TM)  
C: Capacity (20 000 L/h)

**Equation S4.** Electricity for agitation in protein solubilisation <sup>42</sup>

$$\text{Electricity (kwh)} = \frac{EP \cdot TM \cdot V \cdot T}{C} \quad (\text{S4})$$

EP: Engine power (24 kW)  
TM: Quantity of TM (kg)  
V: Volume to agitate (L/kg TM)  
T: Time of agitation (h)  
C: Capacity (4 000 L)

**Equation S5.** Electricity for heat during the protein solubilisation <sup>39</sup>

$$\text{Electricity (kwh)} = \frac{\left( \frac{N \cdot \Delta T \cdot SN}{3\,600\,000} \right) + \left( \frac{TM \cdot \Delta T \cdot STM}{3\,600\,000} \right)}{E} \quad (\text{S5})$$

N: Quantity of NaOH (g)  
 $\Delta T$ : Temperature difference (°C)  
SN: Specific heat of NaOH (3.98 J / g / °C)  
3 600 000: Conversion factor from J to kwh  
STM <sup>38</sup>: Specific heat of defatted TM (3405 J / kg / °C)  
TM: Quantity of TM (kg)  
E: Efficiency (0.75)

**Equation S6.** Steam for pre-concentration <sup>40</sup>

$$\text{Steam (kg)} = SC \cdot W \quad (\text{S6})$$

SC: Steam consumed by a three-effect evaporator (0.4 kg/kg water to evaporate)  
W: Quantity of water to evaporate (kg)

**Equation S7.** Electricity for drying <sup>36</sup>

$$\text{Electricity (kwh)} = \frac{EC \cdot W}{3\,600} \quad (S7)$$

EC: Energy consumption of a single effect spray drying process (5000 kJ/kg of water to evaporate)

W: Quantity of water to evaporate (kg)

3 600: Conversion factor from kJ to kwh

**Equation S8.** Electricity for recuperating solvent and ethanol<sup>37</sup>

$$\text{Electricity (kwh)} = \left( \frac{E \cdot \Delta HE}{3\,600} \right) + \left( \frac{H \cdot \Delta HH}{3\,600} \right) \quad (S8)$$

E: Quantity of ethanol to evaporate (kg)

$\Delta HE$ : Ethanol enthalpy (977 kJ/kg)

3 600: Conversion factor from kJ to kwh

H: Quantity of hexane to evaporate (kg)

$\Delta HH$ : Hexane enthalpy (335 kJ/kg)
